# Supplementary material for: Synaptic loss in behavioural variant frontotemporal dementia revealed by [11C]UCB-J PET
Source: bioRxiv or medRxiv preprint supplement (doi:10.1101/2022.01.30.22270123), 2022-02-01
Supplement: Supplementary file [file media-1.pdf]

## Supplemental Material

**Supplementary Table 1. Group comparisons of regional [<sup>11</sup>C]UCB-J binding potential (BP<sub>ND</sub>) with partial volume correction including aggregated regions. P < 0.05 are highlighted in yellow, while p < 0.001 are highlighted in red.**

|                      | BP <sub>ND</sub> |       |         |       | Statistical parameters |           |        |        |
|----------------------|------------------|-------|---------|-------|------------------------|-----------|--------|--------|
|                      | Mean CT          | SD CT | Mean PT | SD PT | T value                | Cohen's d | p      | p FDR  |
| <i>Frontal L</i>     | 2.87             | 0.22  | 2.22    | 0.33  | -5.99                  | -2.33     | 0.0000 | 0.0001 |
| <i>Frontal R</i>     | 2.90             | 0.21  | 2.28    | 0.31  | -6.03                  | -2.33     | 0.0000 | 0.0001 |
| <i>Temporal L</i>    | 2.57             | 0.24  | 1.96    | 0.30  | -6.08                  | -2.28     | 0.0000 | 0.0001 |
| <i>Temporal R</i>    | 2.62             | 0.22  | 2.03    | 0.32  | -5.63                  | -2.17     | 0.0001 | 0.0002 |
| <i>Parietal L</i>    | 3.04             | 0.24  | 2.54    | 0.29  | -5.03                  | -1.89     | 0.0001 | 0.0003 |
| <i>Parietal R</i>    | 3.01             | 0.22  | 2.53    | 0.31  | -4.71                  | -1.81     | 0.0003 | 0.0004 |
| <i>Occipital L</i>   | 2.90             | 0.28  | 2.56    | 0.33  | -3.06                  | -1.14     | 0.0071 | 0.0075 |
| <i>Occipital R</i>   | 2.89             | 0.25  | 2.51    | 0.35  | -3.19                  | -1.23     | 0.0063 | 0.0071 |
| <i>Cingulate L</i>   | 2.99             | 0.22  | 2.31    | 0.43  | -4.98                  | -2.00     | 0.0003 | 0.0004 |
| <i>Cingulate R</i>   | 2.94             | 0.24  | 2.24    | 0.37  | -5.80                  | -2.26     | 0.0000 | 0.0002 |
| <i>Insula L</i>      | 2.58             | 0.27  | 1.87    | 0.43  | -5.13                  | -2.00     | 0.0002 | 0.0003 |
| <i>Insula R</i>      | 2.69             | 0.26  | 1.79    | 0.39  | -6.91                  | -2.68     | 0.0000 | 0.0001 |
| <i>Hippocampus L</i> | 1.84             | 0.27  | 1.36    | 0.53  | -2.84                  | -1.14     | 0.0147 | 0.0147 |
| <i>Hippocampus R</i> | 1.84             | 0.28  | 1.17    | 0.39  | -5.12                  | -1.96     | 0.0001 | 0.0003 |
| <i>Amygdala L</i>    | 2.46             | 0.32  | 1.86    | 0.49  | -3.80                  | -1.48     | 0.0020 | 0.0024 |
| <i>Amygdala R</i>    | 2.50             | 0.30  | 1.57    | 0.55  | -5.26                  | -2.09     | 0.0002 | 0.0003 |
| <i>Thalamus L</i>    | 2.74             | 0.28  | 2.03    | 0.48  | -4.57                  | -1.80     | 0.0005 | 0.0007 |
| <i>Thalamus R</i>    | 2.86             | 0.31  | 1.86    | 0.79  | -4.07                  | -1.67     | 0.0017 | 0.0022 |

Abbreviations: CT = controls, SD = standard deviation, PT = bvFTD patients, p = p value, FDR = false discovery rate correction, L = left, R = right.

**Supplementary Table 2. Group comparisons of regional [<sup>11</sup>C]UCB-J binding potential (BP<sub>ND</sub>) with partial volume correction in Hammers atlas regions. P < 0.05 are highlighted in yellow, while p < 0.001 are highlighted in red.**

|                          | BP <sub>ND</sub> |          |            |          | Statistical parameters |              |        |        |
|--------------------------|------------------|----------|------------|----------|------------------------|--------------|--------|--------|
|                          | Mean<br>CT       | SD<br>CT | Mean<br>PT | SD<br>PT | T<br>value             | Cohen's<br>d | p      | p FDR  |
| <i>Hippocampus R</i>     | 1.84             | 0.28     | 1.17       | 0.39     | -5.12                  | -1.96        | 0.0001 | 0.0005 |
| <i>Hippocampus L</i>     | 1.84             | 0.27     | 1.36       | 0.53     | -2.84                  | -1.14        | 0.0147 | 0.0172 |
| <i>Amygdala R</i>        | 2.50             | 0.30     | 1.57       | 0.55     | -5.26                  | -2.09        | 0.0002 | 0.0005 |
| <i>Amygdala L</i>        | 2.46             | 0.32     | 1.86       | 0.49     | -3.80                  | -1.48        | 0.0020 | 0.0030 |
| <i>Ant_TL_med R</i>      | 2.22             | 0.20     | 1.27       | 0.61     | -5.04                  | -2.09        | 0.0004 | 0.0009 |
| <i>Ant_TL_med L</i>      | 2.19             | 0.21     | 1.35       | 0.59     | -4.59                  | -1.89        | 0.0008 | 0.0013 |
| <i>Ant_TL_inf Lat R</i>  | 2.50             | 0.23     | 1.79       | 0.62     | -3.68                  | -1.52        | 0.0035 | 0.0050 |
| <i>Ant_TL_inf Lat L</i>  | 2.51             | 0.29     | 1.65       | 0.62     | -4.40                  | -1.78        | 0.0009 | 0.0015 |
| <i>G_paraH_amb R</i>     | 1.72             | 0.25     | 0.98       | 0.40     | -5.64                  | -2.20        | 0.0001 | 0.0004 |
| <i>G_paraH_amb L</i>     | 1.52             | 0.24     | 0.97       | 0.59     | -2.94                  | -1.20        | 0.0128 | 0.0154 |
| <i>G_sup_temp_cent R</i> | 2.84             | 0.20     | 2.21       | 0.43     | -4.62                  | -1.86        | 0.0006 | 0.0011 |
| <i>G_sup_temp_cent L</i> | 2.76             | 0.29     | 2.19       | 0.30     | -5.23                  | -1.90        | 0.0001 | 0.0004 |
| <i>G_tem_midin R</i>     | 2.66             | 0.24     | 1.89       | 0.44     | -5.50                  | -2.19        | 0.0001 | 0.0005 |
| <i>G_tem_midin L</i>     | 2.66             | 0.29     | 1.74       | 0.58     | -5.02                  | -2.02        | 0.0003 | 0.0007 |
| <i>G_occtem La R</i>     | 2.43             | 0.28     | 1.55       | 0.53     | -5.21                  | -2.09        | 0.0002 | 0.0006 |
| <i>G_occtem La L</i>     | 2.38             | 0.25     | 1.56       | 0.55     | -4.76                  | -1.93        | 0.0005 | 0.0010 |
| <i>Insula L</i>          | 2.58             | 0.27     | 1.87       | 0.43     | -5.13                  | -2.00        | 0.0002 | 0.0005 |
| <i>Insula R</i>          | 2.69             | 0.26     | 1.79       | 0.39     | -6.91                  | -2.68        | 0.0000 | 0.0002 |
| <i>OL Rest Lat L</i>     | 2.74             | 0.27     | 2.16       | 0.41     | -4.25                  | -1.66        | 0.0008 | 0.0014 |
| <i>OL Rest Lat R</i>     | 2.71             | 0.24     | 2.22       | 0.40     | -3.71                  | -1.46        | 0.0025 | 0.0037 |
| <i>G_cing_ant_sup L</i>  | 2.87             | 0.24     | 1.82       | 0.72     | -4.72                  | -1.95        | 0.0006 | 0.0012 |
| <i>G_cing_ant_sup R</i>  | 2.82             | 0.27     | 1.85       | 0.55     | -5.52                  | -2.23        | 0.0001 | 0.0005 |
| <i>G_cing_post L</i>     | 3.03             | 0.23     | 2.36       | 0.44     | -4.81                  | -1.92        | 0.0004 | 0.0009 |
| <i>G_cing_post R</i>     | 3.01             | 0.24     | 2.27       | 0.44     | -5.21                  | -2.07        | 0.0002 | 0.0006 |
| <i>FL_mid_fr_G L</i>     | 2.89             | 0.24     | 1.86       | 0.63     | -5.26                  | -2.16        | 0.0002 | 0.0007 |
| <i>FL_mid_fr_G R</i>     | 2.93             | 0.24     | 2.06       | 0.46     | -5.93                  | -2.38        | 0.0001 | 0.0004 |
| <i>PosteriorTL L</i>     | 2.69             | 0.26     | 1.94       | 0.34     | -6.49                  | -2.47        | 0.0000 | 0.0002 |
| <i>PosteriorTL R</i>     | 2.70             | 0.23     | 2.08       | 0.34     | -5.47                  | -2.12        | 0.0001 | 0.0004 |
| <i>PL Rest L</i>         | 2.84             | 0.25     | 2.09       | 0.40     | -5.77                  | -2.25        | 0.0001 | 0.0004 |
| <i>PL Rest R</i>         | 2.80             | 0.23     | 2.17       | 0.37     | -5.27                  | -2.07        | 0.0001 | 0.0005 |
| <i>CaudateNucl L</i>     | 2.99             | 0.34     | 2.55       | 0.44     | -2.94                  | -1.12        | 0.0099 | 0.0124 |
| <i>CaudateNucl R</i>     | 2.97             | 0.34     | 3.44       | 3.09     | 0.50                   | 0.21         | 0.6284 | 0.6284 |
| <i>NuclAccumb L</i>      | 3.84             | 0.33     | 3.03       | 0.77     | -3.31                  | -1.35        | 0.0065 | 0.0086 |
| <i>NuclAccumb R</i>      | 3.97             | 0.38     | 3.18       | 1.17     | -2.18                  | -0.91        | 0.0520 | 0.0585 |
| <i>Putamen L</i>         | 3.93             | 0.38     | 3.34       | 0.41     | -4.12                  | -1.51        | 0.0007 | 0.0012 |
| <i>Putamen R</i>         | 3.86             | 0.35     | 3.20       | 0.44     | -4.38                  | -1.66        | 0.0005 | 0.0010 |
| <i>Thalamus L</i>        | 2.74             | 0.28     | 2.03       | 0.48     | -4.57                  | -1.80        | 0.0005 | 0.0010 |
| <i>Thalamus R</i>        | 2.86             | 0.31     | 1.86       | 0.79     | -4.07                  | -1.67        | 0.0017 | 0.0027 |
| <i>Pallidum L</i>        | 1.71             | 0.27     | 1.27       | 0.28     | -4.34                  | -1.59        | 0.0004 | 0.0009 |

|                             |      |      |      |      |       |       |        |        |
|-----------------------------|------|------|------|------|-------|-------|--------|--------|
| <i>Pallidum R</i>           | 1.96 | 0.25 | 1.57 | 0.29 | -3.93 | -1.46 | 0.0011 | 0.0018 |
| <i>FL_precen_G L</i>        | 2.67 | 0.19 | 2.14 | 0.35 | -4.72 | -1.88 | 0.0004 | 0.0009 |
| <i>FL_precen_G R</i>        | 2.67 | 0.19 | 2.20 | 0.29 | -4.97 | -1.92 | 0.0002 | 0.0006 |
| <i>FL_strai_G L</i>         | 2.76 | 0.28 | 1.66 | 0.54 | -6.38 | -2.55 | 0.0000 | 0.0003 |
| <i>FL_strai_G R</i>         | 2.71 | 0.25 | 1.61 | 0.62 | -5.75 | -2.35 | 0.0001 | 0.0005 |
| <i>FL_OFC_AOG L</i>         | 2.73 | 0.23 | 1.98 | 0.54 | -4.22 | -1.80 | 0.0017 | 0.0027 |
| <i>FL_OFC_AOG R</i>         | 2.78 | 0.23 | 2.21 | 0.89 | -2.07 | -0.87 | 0.0641 | 0.0692 |
| <i>FL_inf_fr_G L</i>        | 2.82 | 0.24 | 1.81 | 0.59 | -5.51 | -2.25 | 0.0002 | 0.0005 |
| <i>FL_inf_fr_G R</i>        | 2.83 | 0.21 | 1.95 | 0.58 | -4.92 | -2.03 | 0.0004 | 0.0009 |
| <i>FL_sup_fr_G L</i>        | 2.84 | 0.25 | 1.93 | 0.49 | -5.85 | -2.35 | 0.0001 | 0.0004 |
| <i>FL_sup_fr_G R</i>        | 2.87 | 0.26 | 2.04 | 0.42 | -6.00 | -2.36 | 0.0000 | 0.0004 |
| <i>PL_postce_G L</i>        | 2.70 | 0.23 | 2.21 | 0.26 | -5.38 | -2.00 | 0.0001 | 0.0004 |
| <i>PL_postce_G R</i>        | 2.68 | 0.22 | 2.21 | 0.25 | -5.26 | -1.96 | 0.0001 | 0.0004 |
| <i>PL_sup_pa_G L</i>        | 3.12 | 0.25 | 2.40 | 0.33 | -6.49 | -2.46 | 0.0000 | 0.0002 |
| <i>PL_sup_pa_G R</i>        | 3.08 | 0.23 | 2.45 | 0.29 | -6.24 | -2.36 | 0.0000 | 0.0002 |
| <i>OL_Ling_G L</i>          | 2.84 | 0.35 | 2.49 | 0.38 | -2.55 | -0.94 | 0.0204 | 0.0233 |
| <i>OL_Ling_G R</i>          | 2.96 | 0.30 | 2.55 | 0.38 | -3.15 | -1.19 | 0.0063 | 0.0085 |
| <i>OL_cuneus L</i>          | 3.12 | 0.35 | 2.67 | 0.48 | -2.77 | -1.06 | 0.0144 | 0.0171 |
| <i>OL_cuneus R</i>          | 3.14 | 0.33 | 2.69 | 0.37 | -3.47 | -1.29 | 0.0029 | 0.0042 |
| <i>FL_OFC_MOG L</i>         | 2.63 | 0.28 | 1.62 | 0.62 | -5.16 | -2.09 | 0.0002 | 0.0007 |
| <i>FL_OFC_MOG R</i>         | 2.66 | 0.30 | 1.70 | 0.67 | -4.61 | -1.87 | 0.0006 | 0.0012 |
| <i>FL_OFC_LOG L</i>         | 2.32 | 0.25 | 1.72 | 0.59 | -3.24 | -1.32 | 0.0073 | 0.0094 |
| <i>FL_OFC_LOG R</i>         | 2.43 | 0.25 | 1.72 | 0.70 | -3.26 | -1.34 | 0.0075 | 0.0095 |
| <i>FL_OFC_POG L</i>         | 2.51 | 0.24 | 1.64 | 0.45 | -6.10 | -2.44 | 0.0000 | 0.0004 |
| <i>FL_OFC_POG R</i>         | 2.53 | 0.23 | 1.55 | 0.61 | -5.18 | -2.13 | 0.0003 | 0.0007 |
| <i>Subgen_antCing L</i>     | 2.73 | 0.31 | 1.57 | 1.13 | -3.35 | -1.40 | 0.0067 | 0.0088 |
| <i>Subgen_antCing R</i>     | 2.57 | 0.38 | 1.52 | 1.01 | -3.36 | -1.38 | 0.0062 | 0.0085 |
| <i>Subcall_area L</i>       | 3.11 | 0.57 | 1.89 | 3.17 | -1.27 | -0.54 | 0.2331 | 0.2452 |
| <i>Subcall_area R</i>       | 2.92 | 0.59 | 2.20 | 3.68 | -0.65 | -0.28 | 0.5295 | 0.5429 |
| <i>Presubgen_antCing L</i>  | 3.41 | 0.38 | 1.91 | 1.72 | -2.87 | -1.21 | 0.0159 | 0.0184 |
| <i>Presubgen_antCing R</i>  | 3.26 | 0.42 | 2.02 | 1.35 | -2.98 | -1.24 | 0.0126 | 0.0154 |
| <i>G_sup_temp_ant L</i>     | 2.25 | 0.26 | 2.03 | 1.31 | -0.56 | -0.24 | 0.5858 | 0.5931 |
| <i>G_sup_temp_ant R</i>     | 2.34 | 0.26 | 1.84 | 0.39 | -3.86 | -1.50 | 0.0017 | 0.0027 |
| <i>Brainstem_mid</i>        | 2.26 | 0.32 | 1.43 | 0.58 | -4.52 | -1.80 | 0.0006 | 0.0011 |
| <i>Brainstem_pon</i>        | 0.96 | 0.15 | 0.75 | 0.17 | -3.56 | -1.32 | 0.0024 | 0.0035 |
| <i>Brainstem_med</i>        | 0.67 | 0.15 | 0.45 | 0.20 | -3.20 | -1.22 | 0.0059 | 0.0082 |
| <i>Cerebellum_gm R</i>      | 2.13 | 0.21 | 1.72 | 0.15 | -6.63 | -2.24 | 0.0000 | 0.0000 |
| <i>Cerebellum_gm L</i>      | 1.44 | 0.73 | 1.71 | 0.19 | 1.73  | 0.51  | 0.0934 | 0.0996 |
| <i>Cerebellum_wm R</i>      | 1.92 | 1.18 | 1.22 | 0.87 | -2.00 | -0.68 | 0.0563 | 0.0624 |
| <i>Cerebellum_wm L</i>      | 1.67 | 0.74 | 1.86 | 0.82 | 0.68  | 0.25  | 0.5029 | 0.5222 |
| <i>Cerebellum_dentate L</i> | 1.05 | 0.16 | 0.87 | 0.28 | -2.08 | -0.82 | 0.0578 | 0.0633 |
| <i>Cerebellum_dentate R</i> | 1.77 | 0.66 | 0.82 | 0.24 | -6.29 | -1.91 | 0.0000 | 0.0000 |

Abbreviations: CT = controls, SD = standard deviation, PT = bvFTD patients, p = p value, FDR = false discovery rate correction, L = left, R = right.

**Supplementary Table 3. Group comparisons of regional [<sup>11</sup>C]UCB-J binding potential (BP<sub>ND</sub>) without partial volume correction in Hammers atlas regions. P < 0.05 are highlighted in yellow, while p < 0.001 are highlighted in red.**

|                          | BP <sub>ND</sub> |       |         |       | Statistical parameters |           |        |        |
|--------------------------|------------------|-------|---------|-------|------------------------|-----------|--------|--------|
|                          | Mean CT          | SD CT | Mean PT | SD PT | T value                | Cohen's d | p      | p FDR  |
| <i>Hippocampus R</i>     | 1.90             | 0.22  | 1.15    | 0.29  | -7.74                  | -2.94     | 0.0000 | 0.0000 |
| <i>Hippocampus L</i>     | 1.89             | 0.21  | 1.27    | 0.36  | -5.39                  | -2.13     | 0.0001 | 0.0002 |
| <i>Amygdala R</i>        | 2.34             | 0.24  | 1.48    | 0.45  | -6.02                  | -2.40     | 0.0000 | 0.0001 |
| <i>Amygdala L</i>        | 2.32             | 0.25  | 1.67    | 0.42  | -4.74                  | -1.87     | 0.0004 | 0.0005 |
| <i>Ant_TL_med R</i>      | 1.92             | 0.19  | 1.18    | 0.40  | -5.88                  | -2.38     | 0.0001 | 0.0002 |
| <i>Ant_TL_med L</i>      | 1.90             | 0.20  | 1.20    | 0.43  | -5.09                  | -2.06     | 0.0003 | 0.0004 |
| <i>Ant_TL_inf Lat R</i>  | 2.15             | 0.21  | 1.47    | 0.42  | -5.05                  | -2.03     | 0.0003 | 0.0004 |
| <i>Ant_TL_inf Lat L</i>  | 2.20             | 0.27  | 1.43    | 0.46  | -5.15                  | -2.03     | 0.0002 | 0.0003 |
| <i>G_paraH_amb R</i>     | 1.73             | 0.21  | 1.08    | 0.28  | -6.87                  | -2.63     | 0.0000 | 0.0000 |
| <i>G_paraH_amb L</i>     | 1.59             | 0.20  | 1.07    | 0.33  | -4.78                  | -1.88     | 0.0003 | 0.0004 |
| <i>G_sup_temp_cent R</i> | 2.03             | 0.17  | 1.48    | 0.24  | -6.89                  | -2.66     | 0.0000 | 0.0000 |
| <i>G_sup_temp_cent L</i> | 1.97             | 0.22  | 1.45    | 0.24  | -5.96                  | -2.20     | 0.0000 | 0.0001 |
| <i>G_tem_midin R</i>     | 2.08             | 0.21  | 1.46    | 0.32  | -5.99                  | -2.33     | 0.0000 | 0.0001 |
| <i>G_tem_midin L</i>     | 2.06             | 0.24  | 1.36    | 0.40  | -5.32                  | -2.09     | 0.0001 | 0.0002 |
| <i>G_occtem La R</i>     | 2.14             | 0.24  | 1.40    | 0.43  | -5.37                  | -2.13     | 0.0001 | 0.0002 |
| <i>G_occtem La L</i>     | 2.11             | 0.21  | 1.41    | 0.42  | -5.26                  | -2.12     | 0.0002 | 0.0003 |
| <i>Insula L</i>          | 1.88             | 0.18  | 1.36    | 0.32  | -5.05                  | -2.00     | 0.0002 | 0.0003 |
| <i>Insula R</i>          | 2.01             | 0.19  | 1.35    | 0.29  | -7.05                  | -2.75     | 0.0000 | 0.0000 |
| <i>OL Rest Lat L</i>     | 1.95             | 0.20  | 1.52    | 0.27  | -4.84                  | -1.85     | 0.0002 | 0.0003 |
| <i>OL Rest Lat R</i>     | 1.94             | 0.18  | 1.57    | 0.26  | -4.22                  | -1.63     | 0.0008 | 0.0009 |
| <i>G_cing_ant_sup L</i>  | 2.16             | 0.21  | 1.33    | 0.47  | -5.68                  | -2.30     | 0.0001 | 0.0002 |
| <i>G_cing_ant_sup R</i>  | 2.05             | 0.23  | 1.33    | 0.38  | -5.90                  | -2.32     | 0.0000 | 0.0001 |
| <i>G_cing_post L</i>     | 2.32             | 0.21  | 1.67    | 0.36  | -5.54                  | -2.18     | 0.0001 | 0.0002 |
| <i>G_cing_post R</i>     | 2.26             | 0.21  | 1.61    | 0.30  | -6.56                  | -2.53     | 0.0000 | 0.0001 |
| <i>FL_mid_fr_G L</i>     | 1.48             | 0.17  | 0.88    | 0.31  | -5.94                  | -2.36     | 0.0001 | 0.0001 |
| <i>FL_mid_fr_G R</i>     | 1.58             | 0.18  | 1.05    | 0.28  | -5.78                  | -2.26     | 0.0001 | 0.0001 |
| <i>PosteriorTL L</i>     | 1.89             | 0.21  | 1.34    | 0.26  | -6.20                  | -2.33     | 0.0000 | 0.0001 |
| <i>PosteriorTL R</i>     | 1.92             | 0.19  | 1.46    | 0.24  | -5.63                  | -2.14     | 0.0000 | 0.0001 |
| <i>PL Rest L</i>         | 1.86             | 0.20  | 1.29    | 0.29  | -5.96                  | -2.29     | 0.0000 | 0.0001 |
| <i>PL Rest R</i>         | 1.89             | 0.18  | 1.42    | 0.25  | -5.64                  | -2.17     | 0.0001 | 0.0001 |
| <i>CaudateNucl L</i>     | 2.35             | 0.25  | 1.51    | 0.55  | -4.80                  | -1.95     | 0.0005 | 0.0006 |
| <i>CaudateNucl R</i>     | 2.30             | 0.26  | 1.44    | 0.49  | -5.46                  | -2.18     | 0.0001 | 0.0002 |
| <i>NuclAccumb L</i>      | 3.01             | 0.25  | 2.16    | 0.51  | -5.27                  | -2.13     | 0.0002 | 0.0003 |
| <i>NuclAccumb R</i>      | 3.03             | 0.25  | 2.12    | 0.52  | -5.51                  | -2.22     | 0.0001 | 0.0002 |
| <i>Putamen L</i>         | 3.12             | 0.30  | 2.49    | 0.39  | -4.77                  | -1.81     | 0.0002 | 0.0003 |
| <i>Putamen R</i>         | 3.19             | 0.29  | 2.55    | 0.40  | -4.83                  | -1.85     | 0.0002 | 0.0003 |
| <i>Thalamus L</i>        | 2.12             | 0.19  | 1.69    | 0.28  | -4.70                  | -1.81     | 0.0003 | 0.0004 |
| <i>Thalamus R</i>        | 2.11             | 0.19  | 1.67    | 0.24  | -5.34                  | -2.01     | 0.0001 | 0.0001 |
| <i>Pallidum L</i>        | 1.33             | 0.20  | 1.04    | 0.19  | -4.13                  | -1.48     | 0.0005 | 0.0006 |
| <i>Pallidum R</i>        | 1.54             | 0.19  | 1.27    | 0.19  | -3.98                  | -1.43     | 0.0007 | 0.0009 |

|                             |      |      |      |      |       |       |        |        |
|-----------------------------|------|------|------|------|-------|-------|--------|--------|
| <i>FL_precen_G L</i>        | 1.39 | 0.11 | 1.08 | 0.18 | -5.13 | -2.01 | 0.0002 | 0.0003 |
| <i>FL_precen_G R</i>        | 1.43 | 0.12 | 1.15 | 0.16 | -5.21 | -2.00 | 0.0001 | 0.0002 |
| <i>FL_strai_G L</i>         | 2.44 | 0.26 | 1.45 | 0.39 | -7.57 | -2.94 | 0.0000 | 0.0000 |
| <i>FL_strai_G R</i>         | 2.38 | 0.23 | 1.44 | 0.39 | -7.53 | -2.97 | 0.0000 | 0.0000 |
| <i>FL_OFC_AOG L</i>         | 2.00 | 0.18 | 1.40 | 0.32 | -5.91 | -2.34 | 0.0001 | 0.0001 |
| <i>FL_OFC_AOG R</i>         | 2.07 | 0.16 | 1.46 | 0.26 | -7.13 | -2.79 | 0.0000 | 0.0000 |
| <i>FL_inf_fr_G L</i>        | 2.09 | 0.20 | 1.32 | 0.34 | -7.09 | -2.80 | 0.0000 | 0.0000 |
| <i>FL_inf_fr_G R</i>        | 2.15 | 0.17 | 1.45 | 0.30 | -7.14 | -2.82 | 0.0000 | 0.0000 |
| <i>FL_sup_fr_G L</i>        | 1.76 | 0.19 | 1.14 | 0.31 | -6.17 | -2.42 | 0.0000 | 0.0001 |
| <i>FL_sup_fr_G R</i>        | 1.76 | 0.19 | 1.19 | 0.26 | -6.65 | -2.54 | 0.0000 | 0.0000 |
| <i>PL_postce_G L</i>        | 1.54 | 0.14 | 1.18 | 0.21 | -5.20 | -2.01 | 0.0001 | 0.0002 |
| <i>PL_postce_G R</i>        | 1.54 | 0.14 | 1.22 | 0.17 | -5.47 | -2.05 | 0.0000 | 0.0001 |
| <i>PL_sup_pa_G L</i>        | 1.80 | 0.17 | 1.30 | 0.20 | -7.21 | -2.70 | 0.0000 | 0.0000 |
| <i>PL_sup_pa_G R</i>        | 1.81 | 0.16 | 1.34 | 0.19 | -7.27 | -2.69 | 0.0000 | 0.0000 |
| <i>OL_Ling_G L</i>          | 2.42 | 0.25 | 2.01 | 0.34 | -3.58 | -1.37 | 0.0027 | 0.0030 |
| <i>OL_Ling_G R</i>          | 2.43 | 0.23 | 2.03 | 0.32 | -3.73 | -1.43 | 0.0021 | 0.0023 |
| <i>OL_cuneus L</i>          | 2.51 | 0.25 | 2.00 | 0.38 | -4.04 | -1.57 | 0.0012 | 0.0014 |
| <i>OL_cuneus R</i>          | 2.50 | 0.27 | 2.04 | 0.38 | -3.63 | -1.40 | 0.0026 | 0.0028 |
| <i>FL_OFC_MOG L</i>         | 2.05 | 0.20 | 1.38 | 0.32 | -6.46 | -2.52 | 0.0000 | 0.0001 |
| <i>FL_OFC_MOG R</i>         | 2.05 | 0.21 | 1.40 | 0.31 | -6.27 | -2.42 | 0.0000 | 0.0001 |
| <i>FL_OFC_LOG L</i>         | 1.91 | 0.20 | 1.39 | 0.28 | -5.57 | -2.14 | 0.0001 | 0.0001 |
| <i>FL_OFC_LOG R</i>         | 1.98 | 0.19 | 1.45 | 0.34 | -4.90 | -1.94 | 0.0003 | 0.0004 |
| <i>FL_OFC_POG L</i>         | 2.02 | 0.20 | 1.40 | 0.26 | -6.99 | -2.66 | 0.0000 | 0.0000 |
| <i>FL_OFC_POG R</i>         | 2.07 | 0.18 | 1.36 | 0.33 | -6.73 | -2.68 | 0.0000 | 0.0001 |
| <i>Subgen_antCing L</i>     | 1.90 | 0.26 | 1.19 | 0.39 | -5.57 | -2.16 | 0.0001 | 0.0001 |
| <i>Subgen_antCing R</i>     | 1.65 | 0.24 | 1.03 | 0.37 | -5.12 | -1.99 | 0.0002 | 0.0002 |
| <i>Subcall_area L</i>       | 2.22 | 0.27 | 1.31 | 0.44 | -6.30 | -2.47 | 0.0000 | 0.0001 |
| <i>Subcall_area R</i>       | 2.24 | 0.28 | 1.29 | 0.48 | -6.11 | -2.41 | 0.0000 | 0.0001 |
| <i>Presubgen_antCing L</i>  | 2.65 | 0.30 | 1.63 | 0.50 | -6.27 | -2.47 | 0.0000 | 0.0001 |
| <i>Presubgen_antCing R</i>  | 2.43 | 0.27 | 1.53 | 0.53 | -5.36 | -2.15 | 0.0002 | 0.0002 |
| <i>G_sup_temp_ant L</i>     | 1.99 | 0.23 | 1.36 | 0.37 | -5.17 | -2.02 | 0.0002 | 0.0002 |
| <i>G_sup_temp_ant R</i>     | 2.06 | 0.23 | 1.48 | 0.33 | -5.23 | -2.02 | 0.0001 | 0.0002 |
| <i>Brainstem_mid</i>        | 1.07 | 0.12 | 0.84 | 0.22 | -3.27 | -1.31 | 0.0063 | 0.0068 |
| <i>Brainstem_pon</i>        | 0.91 | 0.14 | 0.73 | 0.15 | -3.51 | -1.29 | 0.0025 | 0.0027 |
| <i>Brainstem_med</i>        | 0.71 | 0.15 | 0.53 | 0.19 | -2.75 | -1.05 | 0.0146 | 0.0146 |
| <i>Cerebellum_gm R</i>      | 2.02 | 0.20 | 1.59 | 0.17 | -6.55 | -2.30 | 0.0000 | 0.0000 |
| <i>Cerebellum_gm L</i>      | 2.00 | 0.21 | 1.58 | 0.20 | -5.73 | -2.05 | 0.0000 | 0.0001 |
| <i>Cerebellum_wm R</i>      | 0.81 | 0.12 | 0.70 | 0.10 | -2.75 | -0.95 | 0.0111 | 0.0116 |
| <i>Cerebellum_wm L</i>      | 0.81 | 0.12 | 0.69 | 0.11 | -2.83 | -1.02 | 0.0103 | 0.0109 |
| <i>Cerebellum_dentate L</i> | 0.99 | 0.13 | 0.81 | 0.20 | -2.86 | -1.10 | 0.0123 | 0.0126 |
| <i>Cerebellum_dentate R</i> | 0.88 | 0.12 | 0.74 | 0.16 | -2.77 | -1.06 | 0.0144 | 0.0146 |

Abbreviations: CT = controls, SD = standard deviation, PT = bvFTD patients, p = p value, FDR = false discovery rate correction, L = left, R = right.

**Supplementary Table 4. Spearman correlations in the bvFTD group between cognitive scores and**

**[<sup>11</sup>C]UCB-J binding potential (BP<sub>ND</sub>) in aggregated cortical regions of interest. Spearman rho (r) is**

reported alongside p value and Bayesian factor (BF), with \* denoting a p value < 0.05.

| REGION             | ACE-R                           | ATT/OR                         | MEM                           | FLUE                              | LANG                           | VISUO                          | IFS                            | IFS WM                        | MMSE                           | FTD-RS %                      |
|--------------------|---------------------------------|--------------------------------|-------------------------------|-----------------------------------|--------------------------------|--------------------------------|--------------------------------|-------------------------------|--------------------------------|-------------------------------|
| <b>Frontal L</b>   | r=-0.791<br>(0.002)*<br>BF=56.2 | r=0.717<br>(0.007)*<br>BF=21.3 | r=0.653<br>(0.015)*<br>BF=7.9 | r=0.954<br>(< .001)*<br>BF=4720.6 | r=0.795<br>(0.002)*<br>BF=52.5 | r=0.816<br>(0.001)*<br>BF=71.4 | r=0.754<br>(0.006)*<br>BF=29.5 | r=0.74<br>(0.007)*<br>BF=23.4 | r=0.736<br>(0.005)*<br>BF=20.6 | r=-0.055<br>(0.446)<br>BF=0.4 |
| <b>Frontal R</b>   | r=0.118<br>(0.367)<br>BF=0.4    | r=0.028<br>(0.467)<br>BF=0.3   | r=0.027<br>(0.468)<br>BF=0.4  | r=0.396<br>(0.114)<br>BF=1.2      | r=0.354<br>(0.143)<br>BF=1     | r=0.06<br>(0.431)<br>BF=0.3    | r=0.17<br>(0.319)<br>BF=0.7    | r=0.177<br>(0.312)<br>BF=0.7  | r=0.133<br>(0.348)<br>BF=0.4   | r=-0.382<br>(0.139)<br>BF=0.2 |
| <b>Temporal L</b>  | r=0.445<br>(0.086)<br>BF=1.7    | r=0.422<br>(0.098)<br>BF=1.5   | r=0.443<br>(0.086)<br>BF=1.8  | r=0.691<br>(0.009)*<br>BF=12.8    | r=0.612<br>(0.023)*<br>BF=8.2  | r=0.581<br>(0.031)*<br>BF=4.3  | r=0.547<br>(0.051)<br>BF=3.4   | r=0.495<br>(0.073)<br>BF=2.5  | r=0.382<br>(0.123)<br>BF=1     | r=-0.042<br>(0.459)<br>BF=0.4 |
| <b>Temporal R</b>  | r=-0.245<br>(0.774)<br>BF=0.2   | r=-0.244<br>(0.765)<br>BF=0.2  | r=-0.174<br>(0.695)<br>BF=0.2 | r=0.06<br>(0.431)<br>BF=0.4       | r=0.032<br>(0.463)<br>BF=0.4   | r=-0.088<br>(0.601)<br>BF=0.2  | r=0.018<br>(0.48)<br>BF=0.4    | r=-0.012<br>(0.513)<br>BF=0.4 | r=-0.271<br>(0.79)<br>BF=0.2   | r=-0.139<br>(0.354)<br>BF=0.3 |
| <b>Cingulate L</b> | r=0.700<br>(0.008)*<br>BF=10.7  | r=0.619<br>(0.021)*<br>BF=4.9  | r=0.589<br>(0.028)*<br>BF=3.6 | r=0.82<br>(< .001)*<br>BF=46.5    | r=0.814<br>(0.001)*<br>BF=88.9 | r=0.604<br>(0.025)*<br>BF=6.1  | r=0.62<br>(0.028)*<br>BF=2.3   | r=0.581<br>(0.039)*<br>BF=1.9 | r=0.713<br>(0.007)*<br>BF=9.1  | r=-0.067<br>(0.432)<br>BF=0.5 |
| <b>Cingulate R</b> | r=0.073<br>(0.419)<br>BF=0.5    | r=0.141<br>(0.34)<br>BF=0.5    | r=-0.032<br>(0.537)<br>BF=0.3 | r=0.3<br>(0.185)<br>BF=0.9        | r=0.221<br>(0.257)<br>BF=0.6   | r=0.041<br>(0.452)<br>BF=0.3   | r=0.134<br>(0.356)<br>BF=0.7   | r=0.116<br>(0.375)<br>BF=0.8  | r=0.175<br>(0.304)<br>BF=0.6   | r=-0.115<br>(0.379)<br>BF=0.4 |
| <b>Insula L</b>    | r=0.264<br>(0.217)<br>BF=0.9    | r=0.314<br>(0.174)<br>BF=0.9   | r=0.237<br>(0.241)<br>BF=0.7  | r=0.562<br>(0.036)*<br>BF=4.2     | r=0.446<br>(0.085)<br>BF=2.4   | r=0.452<br>(0.082)<br>BF=1.7   | r=0.48<br>(0.08)<br>BF=3.8     | r=0.428<br>(0.109)<br>BF=2.8  | r=0.257<br>(0.222)<br>BF=0.7   | r=-0.273<br>(0.224)<br>BF=0.2 |
| <b>Insula R</b>    | r=-0.136<br>(0.663)<br>BF=0.3   | r=-0.028<br>(0.533)<br>BF=0.3  | r=-0.137<br>(0.656)<br>BF=0.3 | r=0.138<br>(0.343)<br>BF=0.5      | r=0.078<br>(0.41)<br>BF=0.4    | r=-0.065<br>(0.575)<br>BF=0.3  | r=0.061<br>(0.434)<br>BF=0.6   | r=0.037<br>(0.46)<br>BF=0.6   | r=-0.041<br>(0.548)<br>BF=0.3  | r=-0.285<br>(0.214)<br>BF=0.2 |
| <b>Parietal L</b>  | r=0.591<br>(0.028)*<br>BF=3.9   | r=0.351<br>(0.145)<br>BF=1.3   | r=0.616<br>(0.022)*<br>BF=5.7 | r=0.627<br>(0.02)*<br>BF=5.9      | r=0.809<br>(0.001)*<br>BF=30.5 | r=0.461<br>(0.077)<br>BF=1.9   | r=0.632<br>(0.025)*<br>BF=0.8  | r=0.575<br>(0.041)*<br>BF=0.7 | r=0.377<br>(0.127)<br>BF=1.2   | r=-0.042<br>(0.459)<br>BF=1.8 |
| <b>Parietal R</b>  | r=-0.109<br>(0.633)<br>BF=0.3   | r=-0.216<br>(0.738)<br>BF=0.3  | r=-0.027<br>(0.532)<br>BF=0.4 | r=-0.157<br>(0.677)<br>BF=0.3     | r=0.143<br>(0.338)<br>BF=0.5   | r=-0.23<br>(0.752)<br>BF=0.2   | r=-0.14<br>(0.65)<br>BF=0.2    | r=-0.22<br>(0.729)<br>BF=0.2  | r=-0.216<br>(0.738)<br>BF=0.3  | r=0.079<br>(0.594)<br>BF=3    |
| <b>Occipital L</b> | r=-0.255<br>(0.783)<br>BF=0.2   | r=-0.145<br>(0.665)<br>BF=0.2  | r=-0.251<br>(0.772)<br>BF=0.2 | r=-0.051<br>(0.559)<br>BF=0.3     | r=-0.299<br>(0.814)<br>BF=0.2  | r=0.000<br>(0.5)<br>BF=0.3     | r=-0.201<br>(0.711)<br>BF=0.3  | r=-0.196<br>(0.706)<br>BF=0.3 | r=-0.28<br>(0.798)<br>BF=0.2   | r=0.091<br>(0.607)<br>BF=0.5  |
| <b>Occipital R</b> | r=-0.355<br>(0.863)<br>BF=0.2   | r=-0.248<br>(0.769)<br>BF=0.2  | r=-0.315<br>(0.827)<br>BF=0.2 | r=-0.147<br>(0.667)<br>BF=0.2     | r=-0.34<br>(0.847)<br>BF=0.2   | r=-0.138<br>(0.657)<br>BF=0.3  | r=-0.292<br>(0.793)<br>BF=0.2  | r=-0.287<br>(0.79)<br>BF=0.3  | r=-0.372<br>(0.87)<br>BF=0.2   | r=0.236<br>(0.754)<br>BF=0.6  |

Abbreviations: ACE-R = Addenbrooke's cognitive examination revised; ATT/OR= attention/orientation score; MEM = memory; FLUE = fluency; LANG = language; VISUO= visuospatial; IFS = INECO frontal screening; MMSE = mini-mental state examination; WM = working memory; FTD-RS = frontotemporal dementia rating scale; L = left; R = right.
